# Supplementary material for: The chromatin remodeling protein BRG1 regulates HSC-myofibroblast differentiation and liver fibrosis
Source: PubMed Central journal article supplement (PMC10719330; doi:10.1038/s41419-023-06351-5), 2023-12-14
Supplement: 41419_2023_6351_MOESM2_ESM.pdf [file 41419_2023_6351_MOESM2_ESM.pdf]

**Figure 1B**

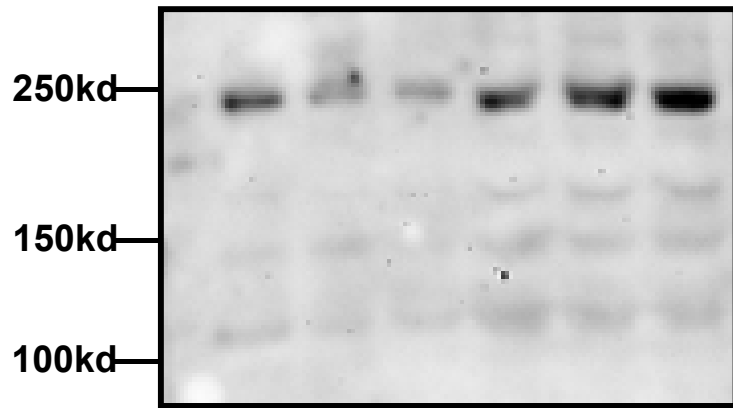

**BRG1 blot**

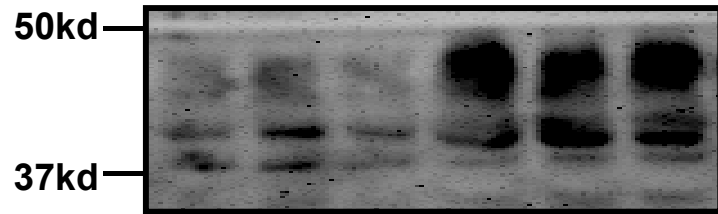

**$\alpha$ -SMA blot**

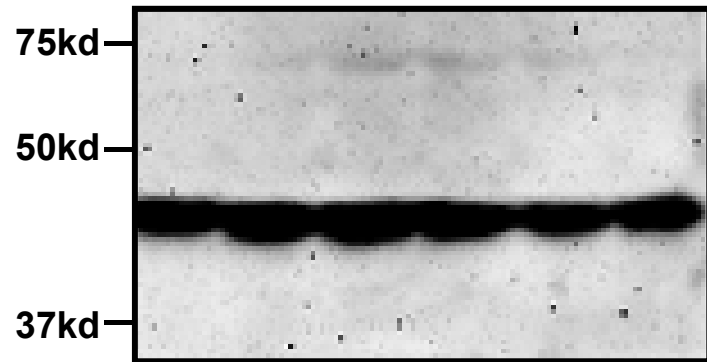

**$\beta$ -actin blot**

**Figure 1D**

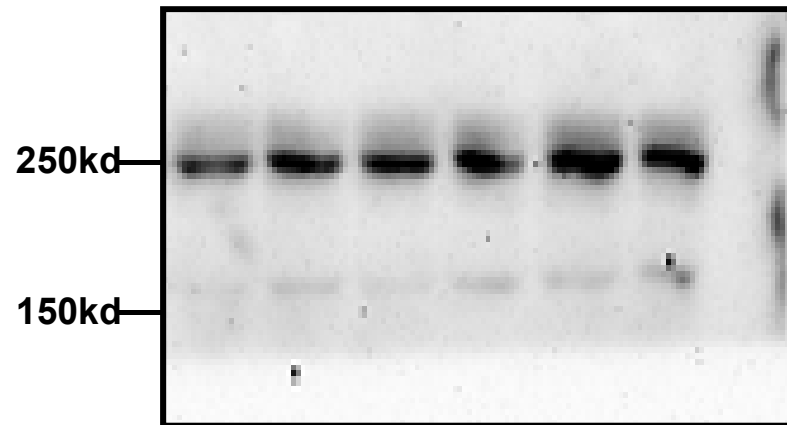

**BRG1 blot**

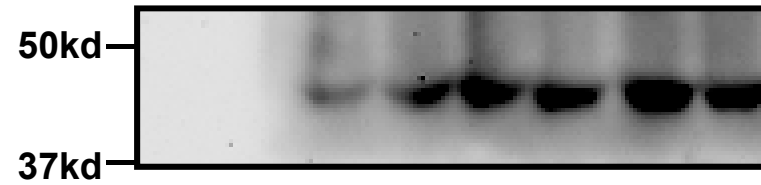

**$\alpha$ -SMA blot**

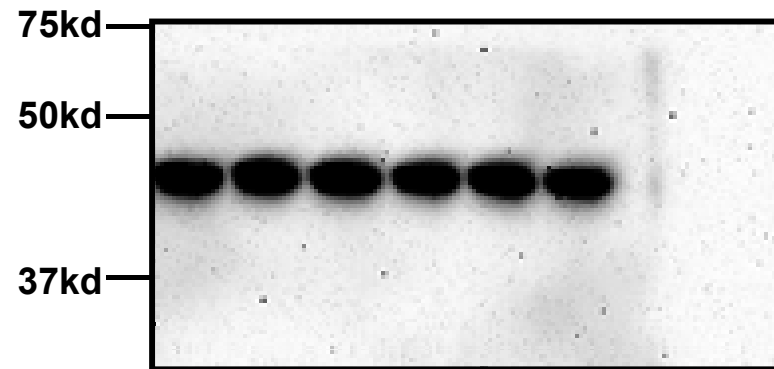

**$\beta$ -actin blot**

**Figure 1F**

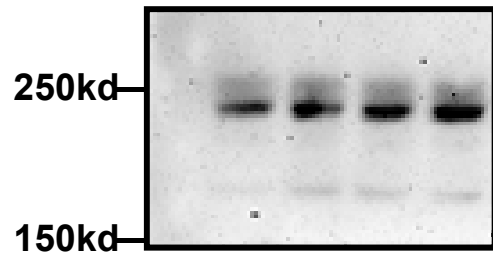

**BRG1 blot**

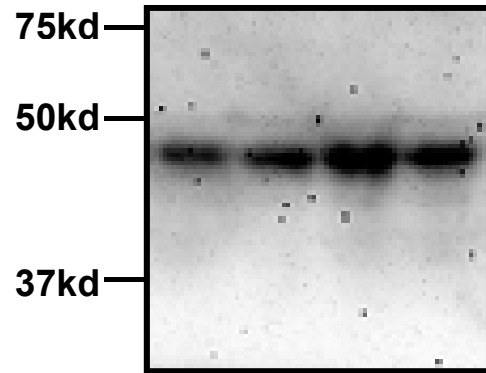

**$\alpha$ -SMA blot**

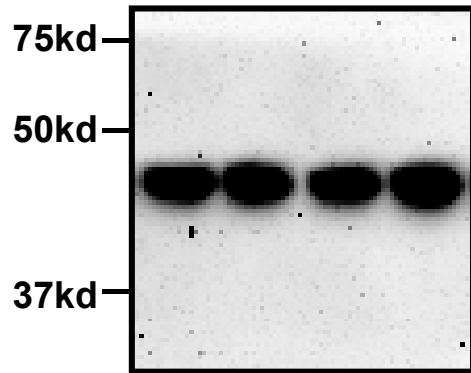

**$\beta$ -actin blot**

**Figure 2D**

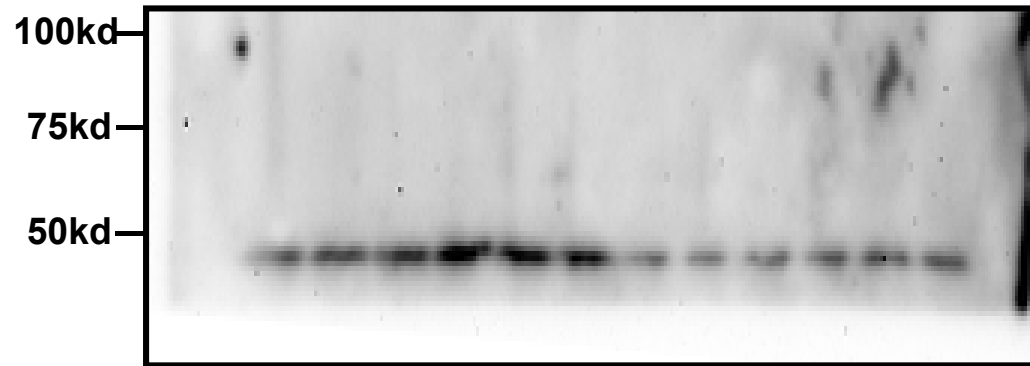

**$\alpha$ -SMA blot**

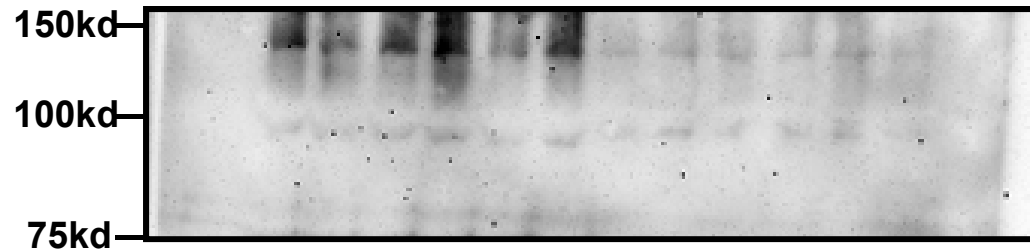

**collagen I blot**

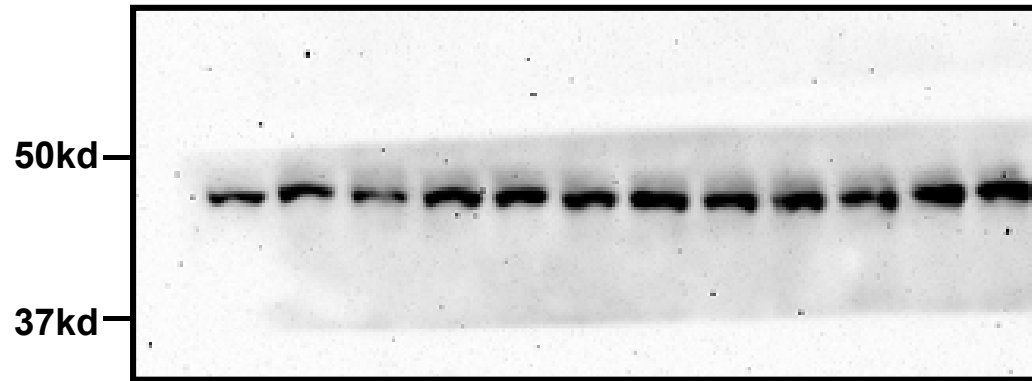

**$\beta$ -actin blot**

**Figure 2J**

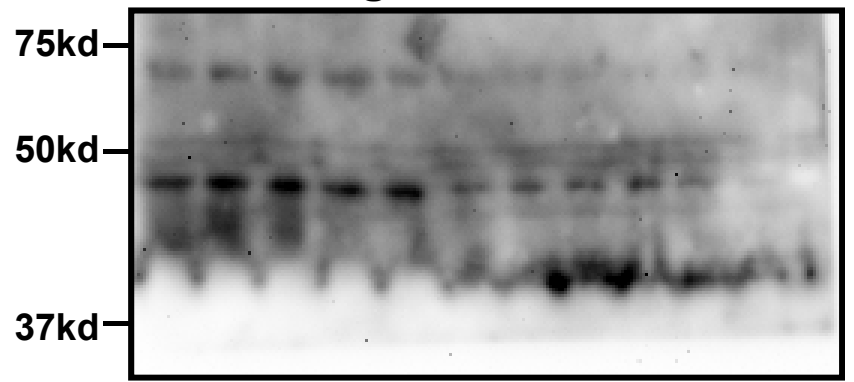

**$\alpha$ -SMA blot**

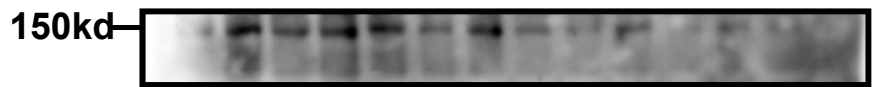

**collagen I blot**

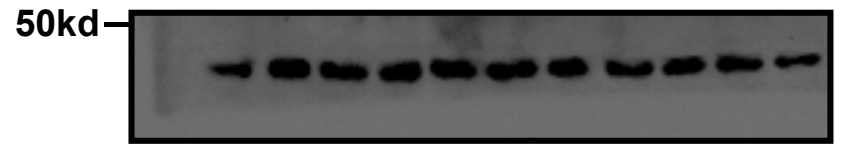

**$\beta$ -actin blot**

**Figure 3E**

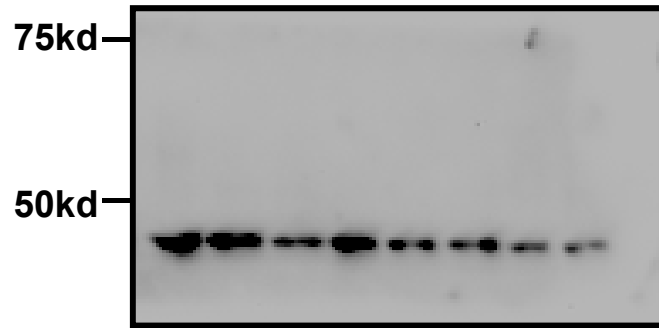

**$\alpha$ -SMA blot**

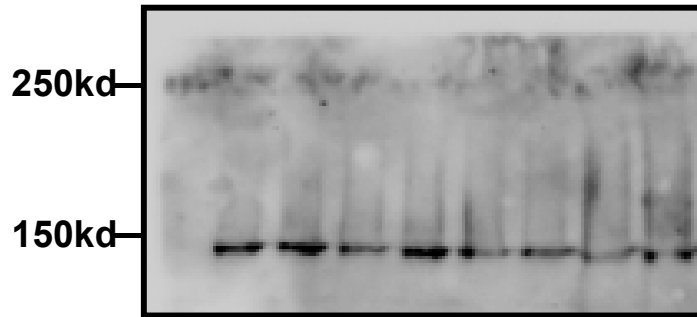

**collagen I blot**

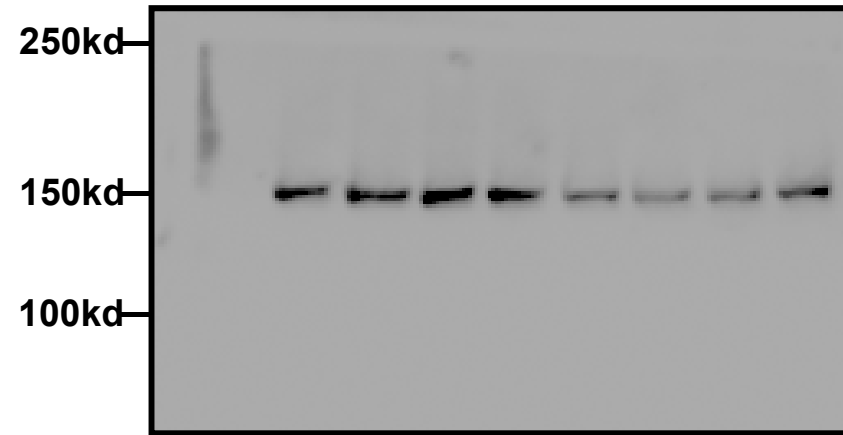

**collagen III blot**

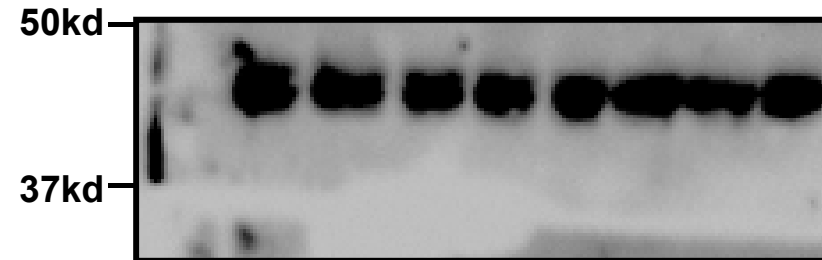

**$\beta$ -actin blot**

**Figure 4H**

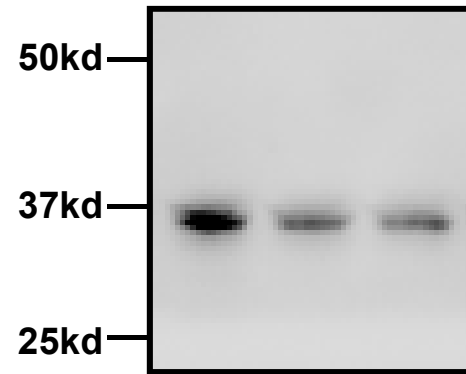

**IGFBP5 blot**

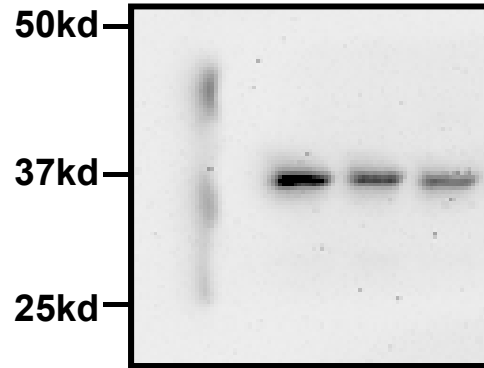

**IGFBP5 blot**

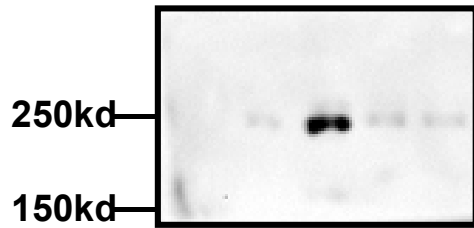

**BRG1 blot**

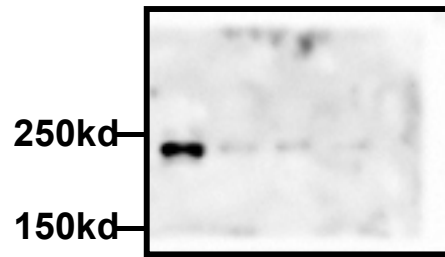

**BRG1 blot**

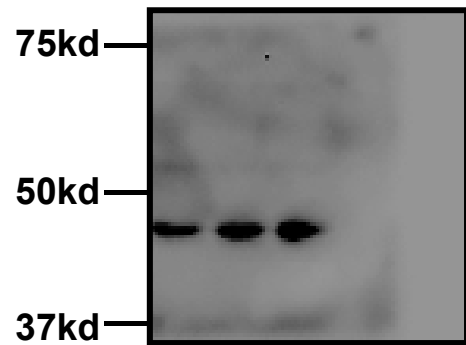

**$\beta$ -actin blot**

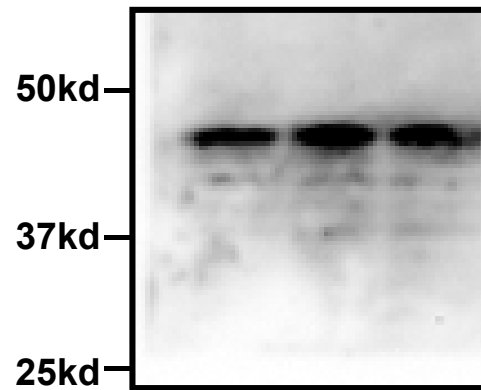

**$\beta$ -actin blot**

**Figure 5H**

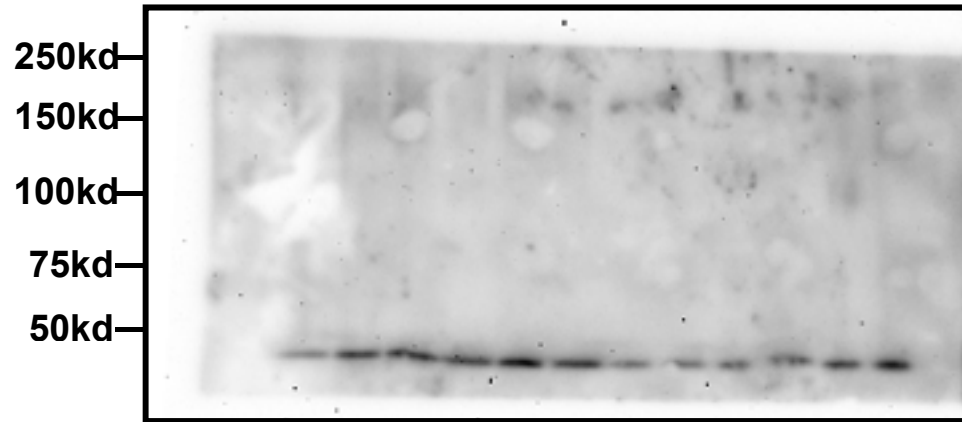

**$\alpha$ -SMA blot**

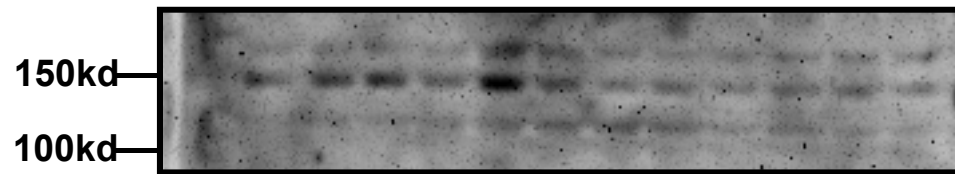

**collagen I blot**

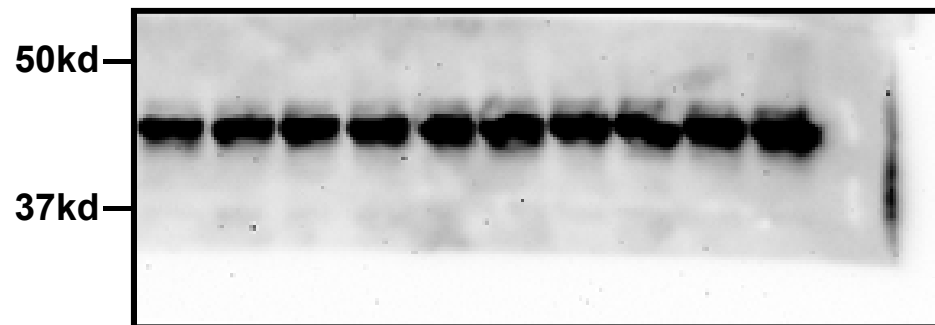

**$\beta$ -actin blot**

**Figure 6E**

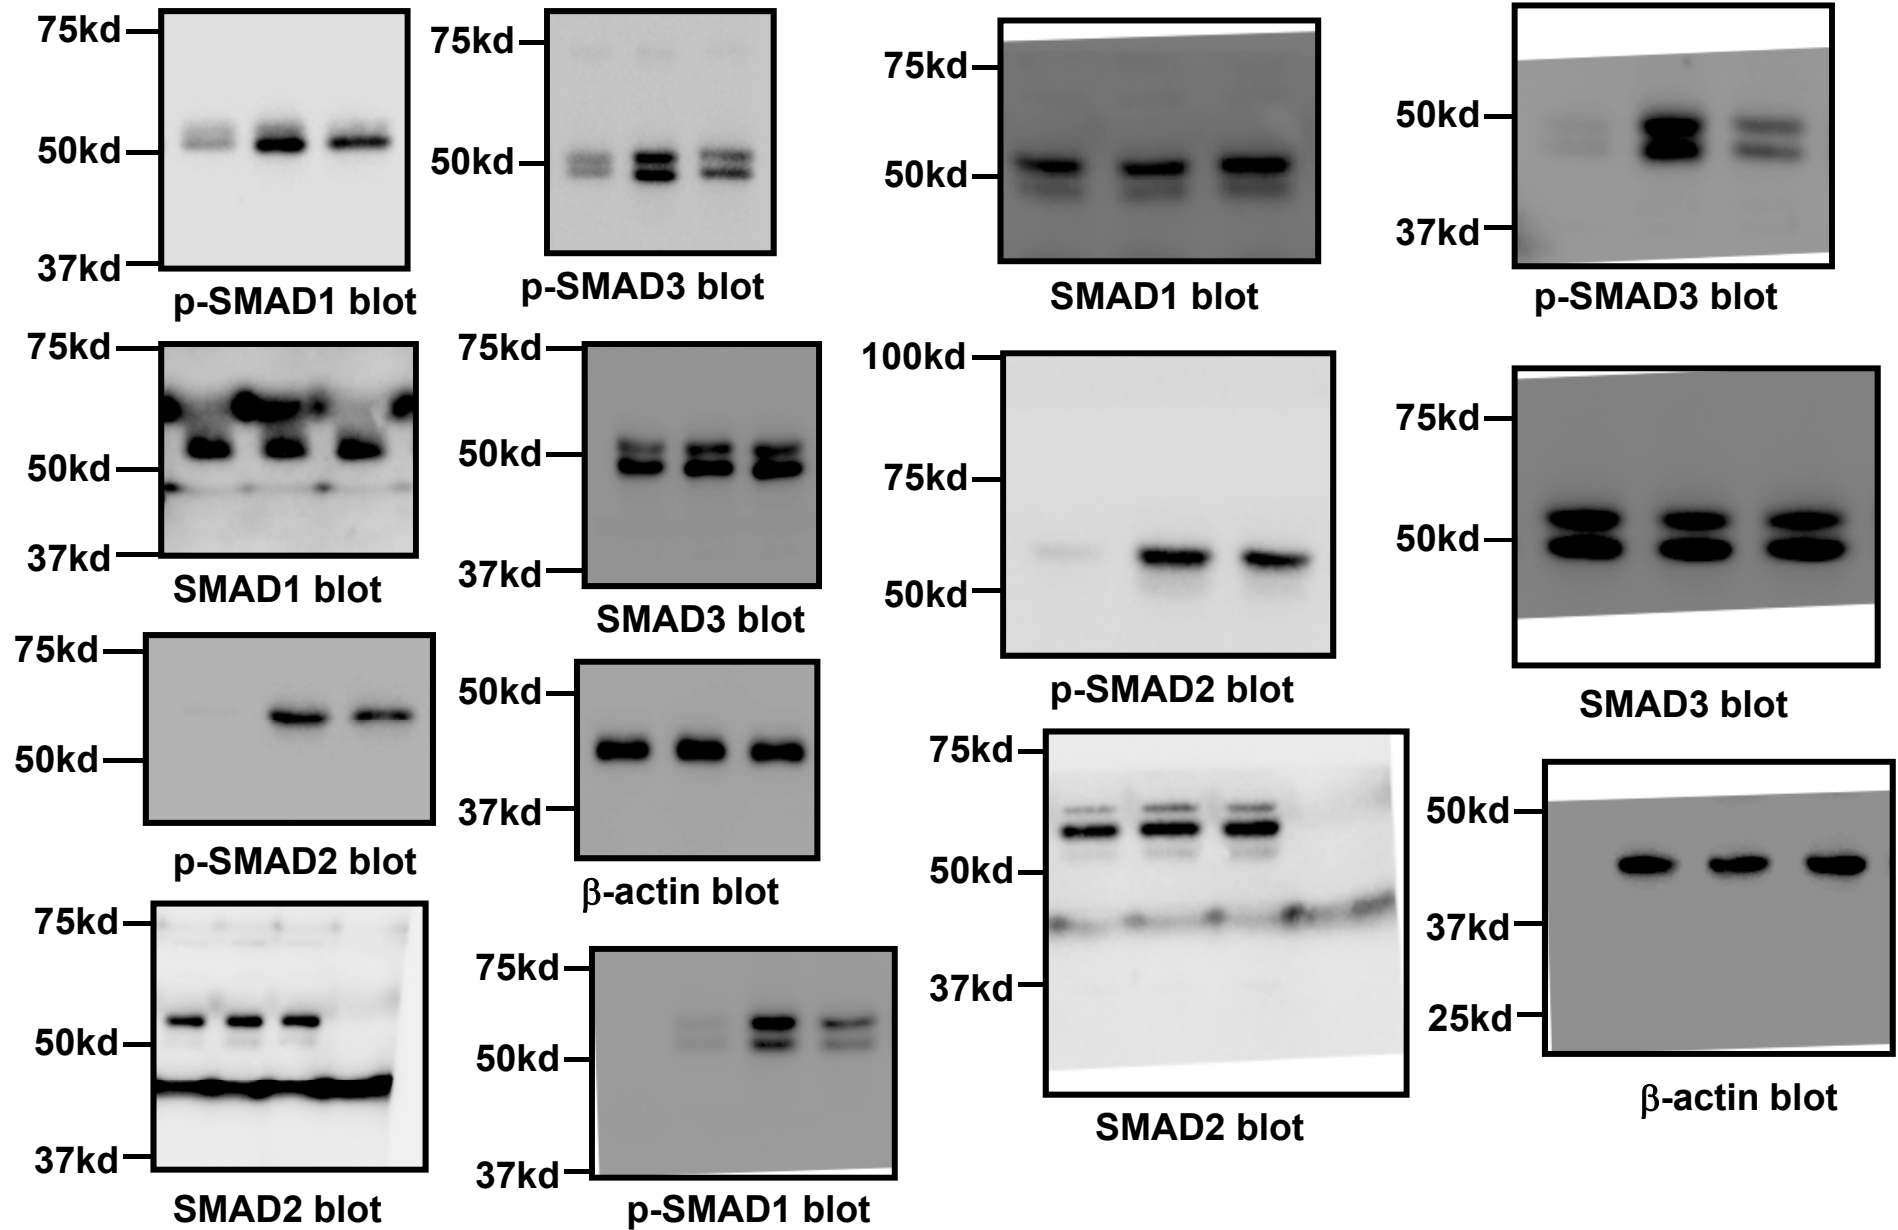

**Figure 6F**

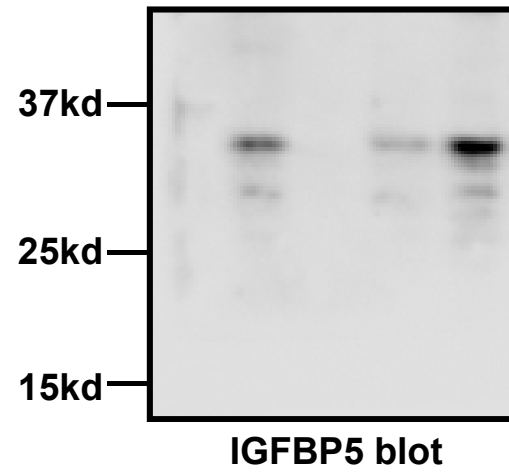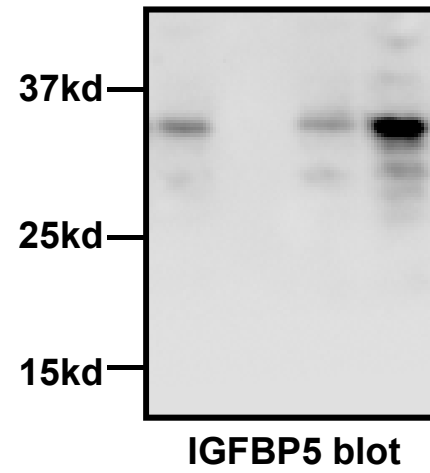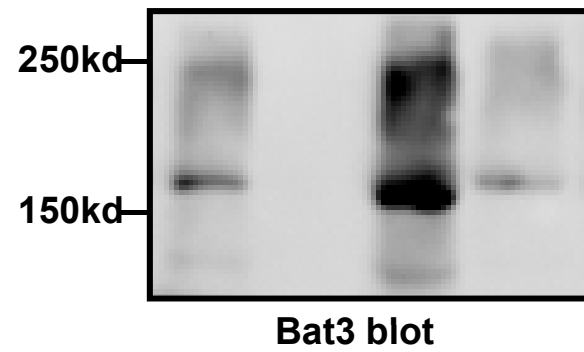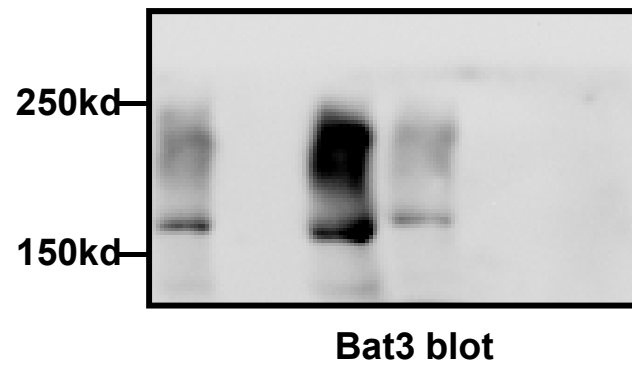



Figure 6G

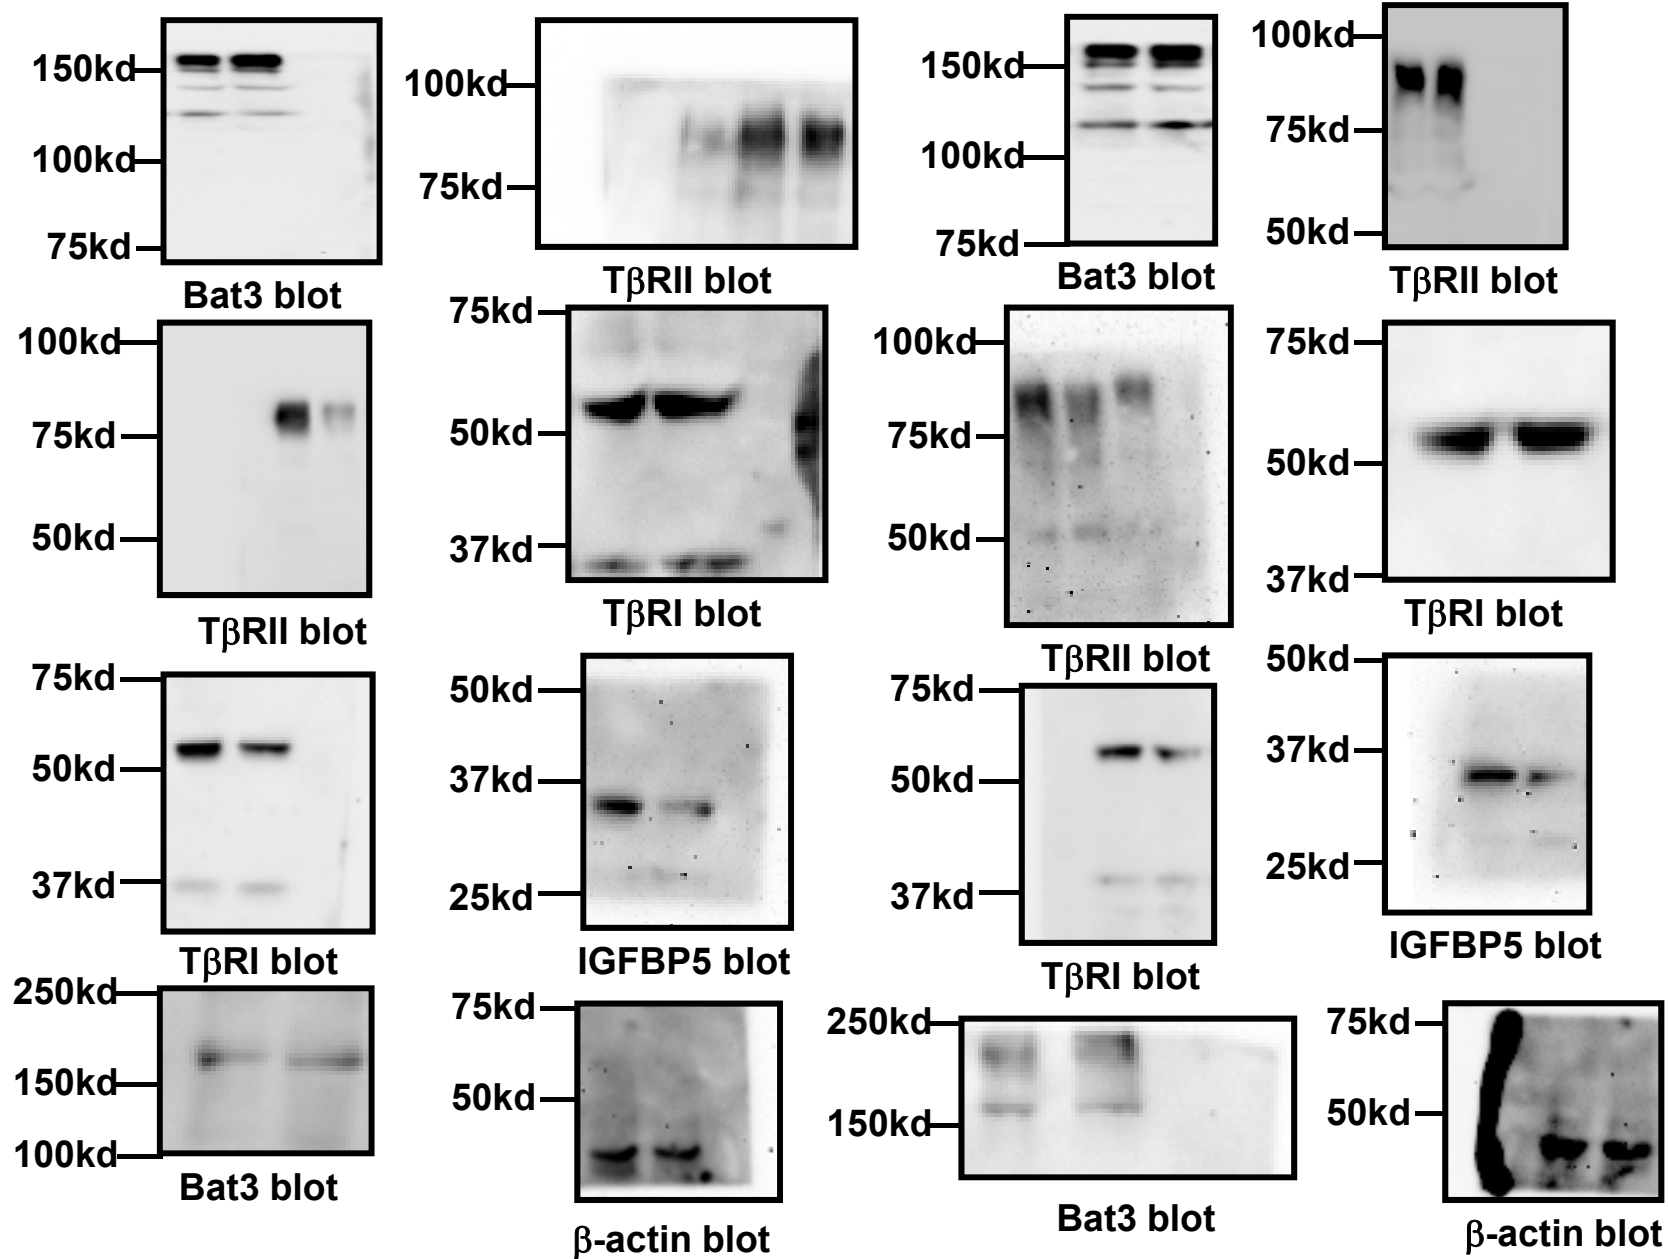

Figure 6I

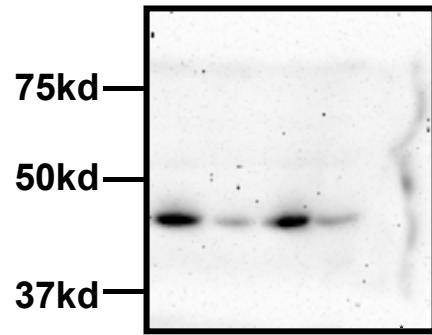

$\alpha$ -SMA blot

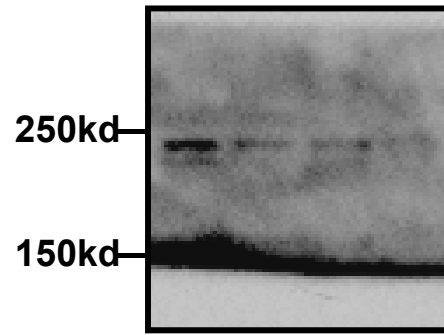

BRG1 blot

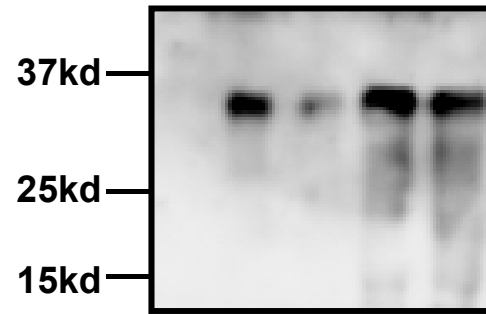

IGFBP5 blot

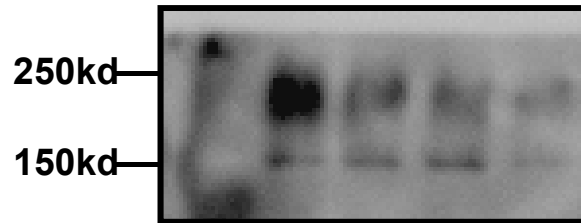

Bat3 blot

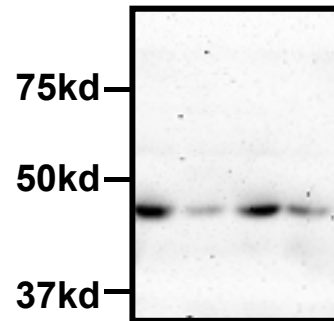

$\alpha$ -SMA blot

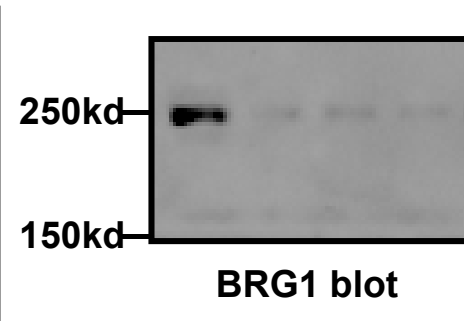

BRG1 blot

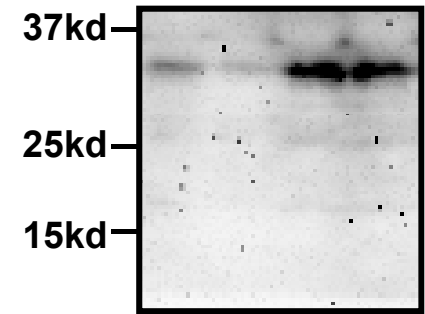

IGFBP5 blot

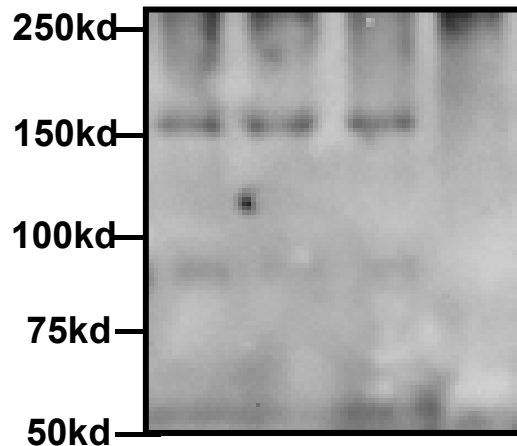

Bat3 blot

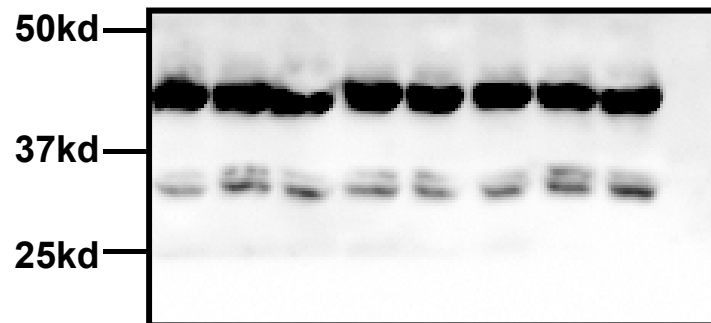

$\beta$ -actin blot
